# Supplementary material
Source: PubMed Central journal article supplement (PMC4495811)
Supplement: i1552-5783-56-8-4198-s01.pdf [file i1552-5783-56-8-4198-s01.pdf]

## SUPPLEMENTARY MATERIALS

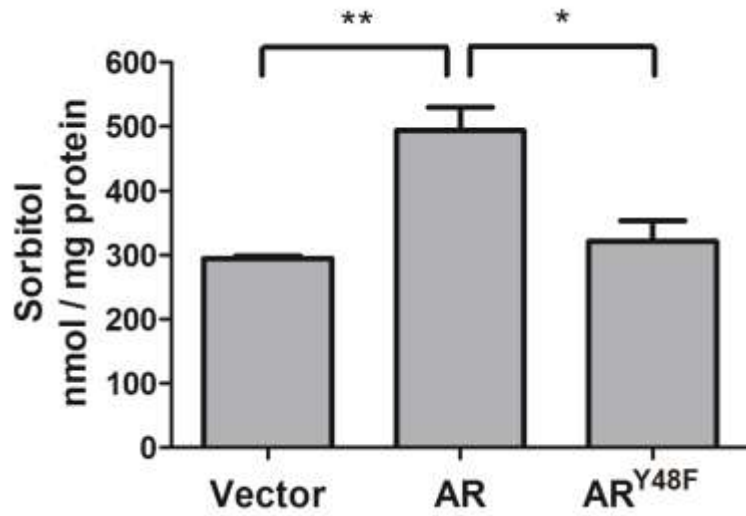

**FIGURE S1.** Overexpression of wild type AR, but not the active site mutant AR<sup>Y48F</sup>, increases sorbitol accumulation in HLE B3 cells.

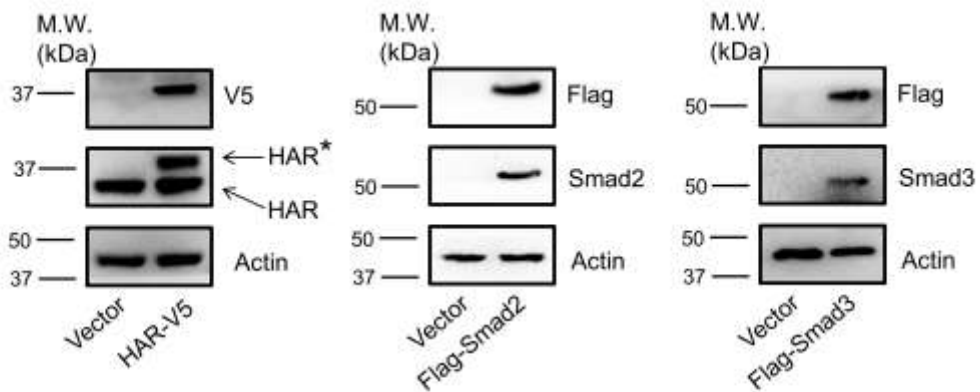

**FIGURE S2.** The HLE B3 cells were transfected with AR-V5, Flag-SMAD2 and Flag-SMAD3 plasmids and examined by V5, AR, Flag, SMAD2 and SMAD3 antibodies. AR\* represents overexpressed AR.

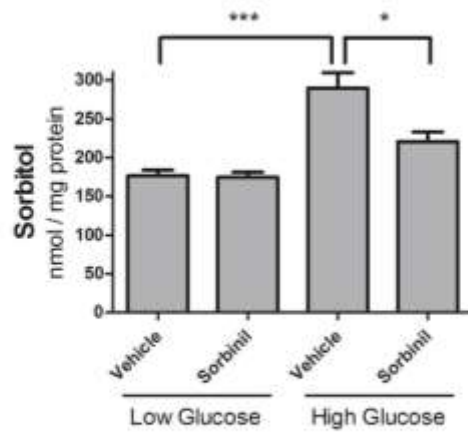

**FIGURE S3.** The inhibitory activity of Sorbinil was determined by sorbitol accumulation. HLE B3 cells were incubated with Sorbinil (10  $\mu$ M) in the presence of low glucose or high glucose medium. Data shown are means  $\pm$  SEM (N = 3). \* $P$  < 0.05; \*\*\* $P$  < 0.005.

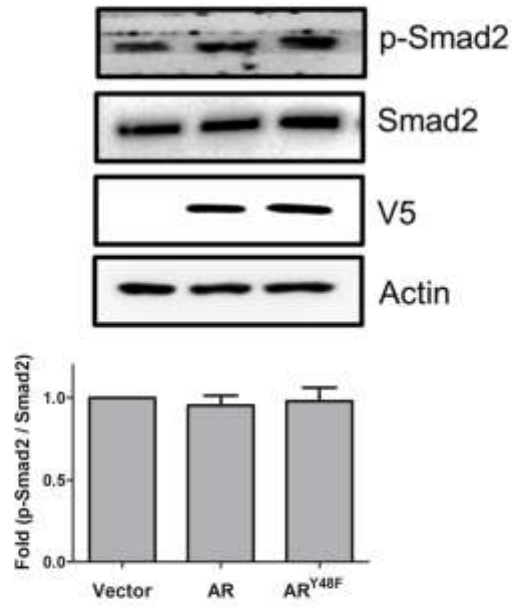

**FIGURE S4.** Overexpression of AR or AR<sup>Y48F</sup> (AR\*) does not enhance SMAD2 activation in the absence of TGF- $\beta$ 2.

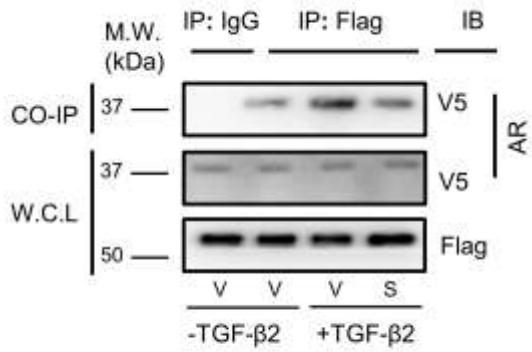

**FIGURE S5.** Sorbinil disrupts AR (conjugated with V5) and SMAD3 (conjugated with Flag) interaction.
